# Supplementary material for: Trehalose and alginate oligosaccharides increase the stability of muscle proteins in frozen shrimp (Litopenaeus vannamei)
Source: Royal Society of Chemistry journal article supplement (doi:10.1039/c9fo02016k), 2020-01-01
Supplement: c9fo02016k1.pdf [file c9fo02016k1.pdf]

1 Supplementary Table S1. The common down-regulated proteins shared in three batches (DW, TR, and AO) versus FS identified by label-free  
2 analysis.

| Accession      | Protein name                                         | Organism                         | Coverage | Peptides | PSMs | Unique Peptides | AAs | MW [kDa] | calc. pI | emPAI   | Score   | Sequest HT |
|----------------|------------------------------------------------------|----------------------------------|----------|----------|------|-----------------|-----|----------|----------|---------|---------|------------|
| F8TCS5         | 40S ribosomal protein S3a                            | <i>Fenneropenaeus merguensis</i> | 35.34    | 9        | 21   | 9               | 266 | 30       | 9.83     | 1.276   | 52.26   |            |
| A0A0P4WS<br>N1 | 60S ribosomal protein L18a                           | <i>Scylla olivacea</i>           | 11.24    | 2        | 5    | 2               | 178 | 20.9     | 10.54    | 0.292   | 10.06   |            |
| A0A2S0UV<br>U2 | 60S ribosomal protein L7A                            | <i>Litopenaeus vannamei</i>      | 4.71     | 1        | 4    | 1               | 276 | 31.3     | 10.86    | 0.086   | 7.99    |            |
| A1KZ91         | Actin 1                                              | <i>Fenneropenaeus chinensis</i>  | 70.74    | 22       | 2975 | 4               | 376 | 41.8     | 5.48     | 757.578 | 3894.39 |            |
| O96658         | Actin 2                                              | <i>Penaeus monodon</i>           | 72.15    | 24       | 4967 | 1               | 377 | 41.8     | 5.24     | 1444.44 | 7004.08 |            |
| H6CSY4         | Actin 6 (Fragment)                                   | <i>Pandalus platyceros</i>       | 50.44    | 10       | 1379 | 3               | 228 | 25.2     | 5.21     | 12.594  | 1103.45 |            |
| A0A0A0PA<br>H2 | Activated C kinase 1 receptor                        | <i>Marsupenaeus japonicus</i>    | 70.75    | 16       | 35   | 16              | 318 | 35.6     | 7.93     | 6.305   | 69.39   |            |
| E2S085         | Alpha-1,4 glucan phosphorylase                       | <i>Marsupenaeus japonicus</i>    | 55.52    | 40       | 583  | 14              | 852 | 98       | 7.25     | 8.698   | 1437.44 |            |
| A0A2P1JJ5<br>8 | Alpha-actinin, sarcomeric-like isoform X1 (Fragment) | <i>Procambarus clarkii</i>       | 60.34    | 53       | 774  | 12              | 890 | 102.7    | 5.35     | 27.23   | 1694.14 |            |
| D0UN61         | Alpha-spectrin (Fragment)                            | <i>Libinia emarginata</i>        | 33.68    | 2        | 5    | 1               | 95  | 11.2     | 4.77     | 0.668   | 9.71    |            |
| B1PVZ9         | Arginine kinase (Fragment)                           | <i>Metapenaeus ensis</i>         | 70.03    | 38       | 2331 | 1               | 357 | 40.2     | 6.62     | 253.83  | 3572.64 |            |
| G3C6M0         | Arginine kinase (Fragment)                           | <i>Paralomis dofleini</i>        | 29.05    | 7        | 359  | 1               | 210 | 23.7     | 8.34     | 5.449   | 346.55  |            |
| P51545         | Arginine kinase                                      | <i>Marsupenaeus japonicus</i>    | 47.89    | 27       | 1842 | 1               | 355 | 40       | 6.8      | 46.579  | 2876.83 |            |

|            |                                               |                                   |       |    |      |    |      |       |      |              |         |
|------------|-----------------------------------------------|-----------------------------------|-------|----|------|----|------|-------|------|--------------|---------|
| A0A0P4WB44 | ATP-dependent (S)-NAD(P)H-hydrate dehydratase | <i>Scylla olivacea</i>            | 6.45  | 2  | 9    | 2  | 310  | 32.8  | 7.42 | 0.438        | 15.2    |
| A0A193CGZ5 | ATP-dependent phosphofructokinase             | <i>6-Macrobrachium nipponense</i> | 8.52  | 9  | 36   | 3  | 974  | 108.1 | 6.15 | 0.46         | 101.74  |
| C7F442     | Beta-actin (Fragment)                         | <i>Penaeus monodon</i>            | 67.53 | 12 | 2271 | 1  | 194  | 21.5  | 6.02 | 183.785      | 2964.52 |
| A0A0C5DJX2 | Calcium-transporting ATPase                   | <i>Cherax destructor</i>          | 22.85 | 21 | 351  | 2  | 1002 | 109.9 | 5.17 | 3.068        | 769.68  |
| U5HSJ7     | Calcium-transporting ATPase                   | <i>Litopenaeus vannamei</i>       | 50.70 | 46 | 740  | 24 | 1002 | 109.7 | 5.27 | 13.513       | 1383.72 |
| K9S0T9     | Calmodulin                                    | <i>Portunus trituberculatus</i>   | 46.98 | 6  | 23   | 6  | 149  | 16.8  | 4.22 | 4.623        | 52.25   |
| A0A0A7HPN7 | DJ-1 protein                                  | <i>Litopenaeus vannamei</i>       | 60.43 | 8  | 23   | 8  | 187  | 19.1  | 5.68 | 2.415        | 50.22   |
| G3GDU6     | Enolase (Fragment)                            | <i>Solenocera crassicornis</i>    | 55.56 | 6  | 80   | 2  | 117  | 12.9  | 4.82 | 9            | 152.43  |
| U5YDS9     | Eukaryotic initiation factor 4A               | <i>Litopenaeus vannamei</i>       | 32.48 | 11 | 24   | 11 | 428  | 48.4  | 5.25 | 1.297        | 54.28   |
| A0A2H4V3E1 | Fast-type skeletal muscle actin 15            | <i>Litopenaeus vannamei</i>       | 72.41 | 25 | 4326 | 4  | 377  | 41.8  | 5.24 | 574.44       | 4693.97 |
| A0A2H4V3U1 | Fast-type skeletal muscle actin 18            | <i>Litopenaeus vannamei</i>       | 72.41 | 25 | 5032 | 1  | 377  | 41.8  | 5.24 | 1736.80<br>1 | 7256.07 |
| A0A2H4V3E4 | Fast-type skeletal muscle actin 8             | <i>Litopenaeus vannamei</i>       | 72.15 | 23 | 3572 | 6  | 377  | 41.9  | 5.31 | 690.831      | 4636.78 |
| A0A2H4V3E2 | Fast-type skeletal muscle actin 9             | <i>Litopenaeus vannamei</i>       | 44.56 | 18 | 2790 | 1  | 377  | 41.9  | 5.24 | 157.489      | 3420.42 |
| E2IH93     | Fatty-acid binding protein                    | <i>Litopenaeus vannamei</i>       | 16.18 | 2  | 7    | 2  | 136  | 15.5  | 5.74 | 0.334        | 9.95    |
| A0A068FCL9 | Fructose-bisphosphate aldolase                | <i>Fenneropenaeus chinensis</i>   | 64.93 | 23 | 609  | 18 | 365  | 39.8  | 7.06 | 45.416       | 1039.47 |

|                |                                          |                                  |       |    |     |    |     |      |       |        |         |
|----------------|------------------------------------------|----------------------------------|-------|----|-----|----|-----|------|-------|--------|---------|
| I7L125         | Gelsolin                                 | <i>Homarus americanus</i>        | 8.36  | 5  | 13  | 5  | 754 | 83.6 | 4.91  | 0.372  | 17.84   |
| P00357         | Glyceraldehyde-3-phosphate dehydrogenase | <i>Homarus americanus</i>        | 43.84 | 14 | 487 | 1  | 333 | 35.7 | 7.01  | 5.629  | 874.66  |
| A0A2S1P7<br>N3 | Glyceraldehyde-3-phosphate dehydrogenase | <i>Litopenaeus vannamei</i>      | 73.49 | 23 | 788 | 9  | 332 | 35.4 | 6.65  | 42.94  | 1650.06 |
| C7G307         | GTP binding protein alpha subunit Go     | <i>Marsupenaeus japonicus</i>    | 10.45 | 3  | 4   | 3  | 354 | 40.3 | 5.44  | 0.269  | 6.96    |
| A0A1B1FH<br>76 | Heat shock protein 70 kDa (Fragment)     | <i>Carcinus maenas</i>           | 26.01 | 5  | 30  | 1  | 223 | 23.9 | 5.03  | 1.955  | 80      |
| A0A1B1FH<br>65 | Heat shock protein 70 kDa (Fragment)     | <i>Cardisoma armatum</i>         | 24.03 | 10 | 59  | 2  | 516 | 57   | 5.4   | 1.195  | 165.77  |
| A0A1B1FG<br>Y0 | Heat shock protein 70 kDa                | <i>Chaceon affinis</i>           | 18.20 | 9  | 54  | 1  | 654 | 71.4 | 5.53  | 0.931  | 148.02  |
| C3VC58         | Heat shock protein 90                    | <i>Penaeus monodon</i>           | 18.75 | 12 | 32  | 2  | 720 | 83.5 | 4.96  | 0.829  | 62.81   |
| Q26180         | Hemocyanin                               | <i>Litopenaeus vannamei</i>      | 52.11 | 33 | 330 | 24 | 662 | 74.9 | 5.52  | 21.675 | 696.02  |
| G1AP69         | Hemocyanin                               | <i>Penaeus monodon</i>           | 33.67 | 20 | 191 | 2  | 683 | 77.9 | 5.57  | 7.072  | 319.82  |
| A0A059TE<br>W9 | Hemocyanin subunit L1 (Fragment)         | <i>Litopenaeus vannamei</i>      | 53.03 | 34 | 347 | 5  | 677 | 77.2 | 5.77  | 33.268 | 793.65  |
| A0A059TG<br>C6 | Hemocyanin subunit L1 (Fragment)         | <i>Litopenaeus vannamei</i>      | 46.38 | 31 | 330 | 2  | 677 | 77.2 | 5.92  | 18.169 | 748.49  |
| A0A0G2YA<br>K1 | Hemocyanin V4                            | = <i>Litopenaeus vannamei</i>    | 48.82 | 26 | 201 | 7  | 678 | 77.6 | 5.94  | 9.513  | 378.97  |
| A0A0D6DQ<br>G1 | Histone H2A                              | <i>Macrobrachium rosenbergii</i> | 28.47 | 3  | 35  | 3  | 137 | 14.7 | 10.49 | 1.512  | 63.77   |
| A0A0N7G7       | Histone H2B (Fragment)                   | <i>Eriocheir sinensis</i>        | 26.83 | 3  | 32  | 3  | 123 | 13.6 | 10.39 | 2.728  | 49.84   |

37

|                |                                      |                               |       |     |      |    |      |       |       |          |          |
|----------------|--------------------------------------|-------------------------------|-------|-----|------|----|------|-------|-------|----------|----------|
| A0A0P4W<br>MJ1 | Histone H3                           | <i>Scylla olivacea</i>        | 11.76 | 2   | 8    | 2  | 136  | 15.3  | 11.27 | 0.425    | 9.39     |
| A0A0P4VP<br>L0 | Histone H4                           | <i>Scylla olivacea</i>        | 41.75 | 5   | 30   | 5  | 103  | 11.4  | 11.36 | 4.012    | 62.75    |
| A0A2P1JJ6<br>4 | Isocitrate dehydrogenase (Fragment)  | <i>Procambarus clarkii</i>    | 17.26 | 7   | 21   | 7  | 446  | 50.1  | 8.1   | 0.658    | 41.18    |
| I1VSB4         | L-lactate dehydrogenase              | <i>Litopenaeus vannamei</i>   | 61.45 | 17  | 261  | 17 | 332  | 36    | 7.31  | 30.623   | 671.84   |
| A0A0P4WL<br>G3 | Malate dehydrogenase                 | <i>Scylla olivacea</i>        | 18.98 | 6   | 25   | 6  | 332  | 35.8  | 6.05  | 0.905    | 47.83    |
| F8QXK4         | Myosin (Fragment)                    | <i>Scylla paramamosain</i>    | 31.52 | 6   | 328  | 4  | 184  | 20.5  | 9.06  | 10.45    | 483.76   |
| Q8T6G0         | Myosin heavy chain (Fragment)        | <i>Homarus gammarus</i>       | 51.22 | 1   | 4    | 1  | 41   | 4.6   | 5.11  | 3.642    | 3.61     |
| A0A288ZB<br>A6 | Myosin heavy chain                   | <i>Palaemon carinicauda</i>   | 17.93 | 37  | 2209 | 3  | 1913 | 217.7 | 6.05  | 1.888    | 3458.76  |
| K4Q111         | Myosin heavy chain type 1            | <i>Litopenaeus vannamei</i>   | 70.47 | 191 | 9279 | 53 | 1913 | 219.6 | 6.02  | 265.708  | 17224.86 |
| K4Q4N8         | Myosin heavy chain type 1            | <i>Penaeus monodon</i>        | 51.93 | 134 | 6436 | 6  | 1914 | 219.5 | 6.05  | 41.907   | 10793.78 |
| N0DV32         | Myosin heavy chain type 3 (Fragment) | <i>Penaeus monodon</i>        | 52.86 | 24  | 1047 | 3  | 297  | 34.5  | 5.59  | 33.333   | 1025.32  |
| F8WR03         | Myosin heavy chain type a            | <i>Marsupenaeus japonicus</i> | 48.95 | 124 | 6451 | 3  | 1912 | 219.4 | 6.07  | 40.158   | 10905.55 |
| F8WR04         | Myosin heavy chain type b            | <i>Marsupenaeus japonicus</i> | 47.59 | 114 | 4907 | 6  | 1910 | 218.9 | 6.37  | 29.576   | 7884.7   |
| D4P8F7         | Myosin light chain                   | <i>Marsupenaeus japonicus</i> | 79.08 | 11  | 1007 | 6  | 153  | 17.5  | 4.74  | 1210.528 | 1387.32  |
| A5J299         | Nucleoside diphosphate kinase        | <i>Litopenaeus vannamei</i>   | 58.28 | 8   | 38   | 8  | 151  | 17    | 7.24  | 14.199   | 37.44    |
| D7F2L7         | Paramyosin (Fragment)                | <i>Palaemon varians</i>       | 33.82 | 2   | 26   | 2  | 68   | 8     | 8.15  | 4.179    | 55.51    |

|             |                                                   |                               |        |    |     |    |      |       |       |        |         |
|-------------|---------------------------------------------------|-------------------------------|--------|----|-----|----|------|-------|-------|--------|---------|
| G5D053      | Peptidyl-prolyl cis-trans isomerase               | <i>Litopenaeus vannamei</i>   | 70.12  | 9  | 44  | 9  | 164  | 17.6  | 8.25  | 5.494  | 117.13  |
| A0A2P1JJ63  | Phosphoglucomutase-1-like (Fragment)              | <i>Procambarus clarkii</i>    | 11.41  | 5  | 22  | 5  | 561  | 60.9  | 5.78  | 0.468  | 48.67   |
| A0A0P4WYI4  | Phosphoglycerate mutase                           | <i>Scylla olivacea</i>        | 23.25  | 8  | 93  | 4  | 314  | 35.1  | 8.79  | 1.683  | 118.47  |
| A0A0S1LK K8 | Phosphopyruvate hydratase                         | <i>Marsupenaeus japonicus</i> | 58.53  | 22 | 726 | 1  | 434  | 47.3  | 6.4   | 10.994 | 1769.5  |
| O96656      | Phosphopyruvate hydratase                         | <i>Penaeus monodon</i>        | 68.89  | 25 | 786 | 2  | 434  | 47.2  | 6.62  | 16.013 | 2017.24 |
| A0A0P4VUA5  | Phosphorylase b kinase regulatory subunit         | <i>Scylla olivacea</i>        | 5.28   | 7  | 12  | 7  | 1212 | 136.1 | 6.65  | 0.216  | 28.42   |
| A5J297      | Profilin                                          | <i>Litopenaeus vannamei</i>   | 27.78  | 3  | 17  | 3  | 126  | 13.9  | 6.77  | 2.594  | 11.54   |
| Q86GD6      | Projectin                                         | <i>Procambarus clarkii</i>    | 10.55  | 80 | 389 | 77 | 8625 | 962   | 6.43  | 0.406  | 766.82  |
| L0CM38      | QM protein                                        | <i>Litopenaeus vannamei</i>   | 15.45  | 4  | 11  | 4  | 220  | 25.5  | 10.05 | 0.65   | 25.36   |
| A0A2D3E2V2  | Rab GDP dissociation inhibitor (Fragment)         | <i>Procambarus clarkii</i>    | 24.72  | 8  | 35  | 1  | 445  | 50.1  | 5.68  | 1.154  | 83.45   |
| M4M7B8      | Ribosomal protein L18                             | <i>Litopenaeus vannamei</i>   | 26.60  | 4  | 13  | 4  | 188  | 21.6  | 11.66 | 0.995  | 22.35   |
| C4PL18      | Ribosomal protein L3                              | <i>Penaeus monodon</i>        | 20.94  | 8  | 14  | 6  | 406  | 46.4  | 10.3  | 1.021  | 31.35   |
| Q2I3E8      | Ribosomal protein L8                              | <i>Litopenaeus vannamei</i>   | 24.90  | 5  | 18  | 5  | 257  | 28.2  | 11.05 | 0.957  | 30.16   |
| D9J2T3      | Ryanodine receptor (Fragment)                     | <i>Litopenaeus vannamei</i>   | 33.68  | 28 | 109 | 15 | 1238 | 139.6 | 4.68  | 2.162  | 247.09  |
| A0A0G2QMX0  | Ryanodine receptor (Fragment)                     | <i>Procambarus clarkii</i>    | 14.23  | 2  | 9   | 1  | 267  | 30.5  | 4.98  | 0.438  | 16.6    |
| P86909      | Sarcoplasmic calcium-binding protein (Fragment)   | <i>Chionoecetes opilio</i>    | 100.00 | 1  | 46  | 1  | 8    | 0.8   | 9.99  | 9      | 64.38   |
| D7F2L3      | Sarcoplasmic calcium-binding protein 1 (Fragment) | <i>Palaemon varians</i>       | 32.35  | 3  | 379 | 1  | 68   | 7.7   | 4.84  | 2.162  | 129.08  |

|                |                                                                |                                 |       |    |      |    |      |       |      |         |         |
|----------------|----------------------------------------------------------------|---------------------------------|-------|----|------|----|------|-------|------|---------|---------|
| C7A639         | Sarcoplasmic calcium-binding protein                           | <i>Litopenaeus vannamei</i>     | 87.05 | 25 | 2938 | 5  | 193  | 22.1  | 4.89 | 706.946 | 3631.2  |
| P02636         | Sarcoplasmic calcium-binding protein,<br>alpha-B and -A chains | <i>Penaeus sp.</i>              | 69.79 | 20 | 2169 | 4  | 192  | 22    | 4.81 | 49.119  | 2120.46 |
| P02635         | Sarcoplasmic calcium-binding protein,<br>beta chain            | <i>Penaeus sp.</i>              | 46.88 | 11 | 884  | 6  | 192  | 22    | 4.67 | 22.357  | 1021.14 |
| K4EG00         | Skeletal muscle alpha actin<br>(Fragment)                      | <i>Pandalus platyceros</i>      | 33.94 | 7  | 1508 | 1  | 218  | 24.2  | 5.29 | 7.483   | 1587.83 |
| Q6XGZ8         | Slow muscle myosin S1 heavy chain<br>(Fragment)                | <i>Homarus americanus</i>       | 36.88 | 23 | 906  | 3  | 507  | 58.5  | 5.27 | 5.19    | 846.45  |
| G9D972         | Small heat shock protein                                       | <i>Fenneropenaeus chinensis</i> | 30.43 | 4  | 22   | 4  | 184  | 21    | 5.49 | 1.239   | 60.65   |
| F4YYJ0         | Sodium potassium-transporting<br>ATPase subunit beta           | <i>Litopenaeus vannamei</i>     | 21.09 | 5  | 10   | 5  | 313  | 35.9  | 5.55 | 0.616   | 22.72   |
| A0A139Z42<br>4 | Sodium/potassium-transporting<br>ATPase subunit alpha          | <i>Litopenaeus vannamei</i>     | 31.98 | 26 | 51   | 17 | 1038 | 115.3 | 5.48 | 1.31    | 130.01  |
| A0A2H4V3<br>F4 | Specific actin 1                                               | <i>Litopenaeus vannamei</i>     | 61.44 | 20 | 2323 | 8  | 376  | 41.7  | 5.39 | 82.176  | 2339.71 |
| A0A0N7ZD<br>R2 | T-complex protein 1 subunit delta                              | <i>Scylla olivacea</i>          | 17.98 | 8  | 16   | 8  | 534  | 57.6  | 7.91 | 0.632   | 38.68   |
| A0A0P0C4<br>Q7 | Tetraspanin                                                    | <i>Litopenaeus vannamei</i>     | 29.29 | 3  | 14   | 3  | 239  | 25.7  | 4.65 | 2.162   | 43.35   |
| B0FC92         | Translationally controlled tumor<br>protein                    | <i>Litopenaeus vannamei</i>     | 29.17 | 4  | 13   | 4  | 168  | 19.2  | 4.53 | 2.511   | 23.26   |
| A1KYZ2         | Tropomyosin                                                    | <i>Penaeus monodon</i>          | 77.46 | 37 | 1486 | 9  | 284  | 32.8  | 4.75 | 130.113 | 2038.73 |
| A0A2P0ND       | Troponin C                                                     | <i>Palaemon carinicauda</i>     | 16.67 | 4  | 79   | 2  | 150  | 16.9  | 4.03 | 1.894   | 185.99  |

---

|                |                                  |     |                                     |       |    |     |    |     |      |      |        |        |
|----------------|----------------------------------|-----|-------------------------------------|-------|----|-----|----|-----|------|------|--------|--------|
| U8             |                                  |     |                                     |       |    |     |    |     |      |      |        |        |
| G8H4B7         | Troponin C1                      |     | <i>Litopenaeus vannamei</i>         | 51.33 | 8  | 100 | 4  | 150 | 16.8 | 4.02 | 9      | 289.92 |
| K7WFT8         | Troponin I                       |     | <i>Litopenaeus vannamei</i>         | 48.61 | 15 | 294 | 3  | 216 | 24.8 | 9.51 | 19.153 | 601.98 |
| A0A2P0ND<br>U9 | Troponin T                       |     | <i>Palaemon carinicauda</i>         | 17.92 | 11 | 245 | 11 | 385 | 45.7 | 5.06 | 3.541  | 325.73 |
| I6LKV7         | Ubiquitin/ribosomal<br>protein 2 | S27 | fusion<br><i>Eriocheir sinensis</i> | 33.76 | 5  | 43  | 5  | 157 | 17.9 | 9.74 | 2.162  | 55.85  |
| U5TQQ5         | Valosin-containing protein       |     | <i>Penaeus monodon</i>              | 28.33 | 16 | 53  | 6  | 826 | 91.6 | 5.67 | 1.154  | 101.77 |

---
