# Supplementary material for: Trehalose and alginate oligosaccharides increase the stability of muscle proteins in frozen shrimp (Litopenaeus vannamei)
Source: Royal Society of Chemistry journal article supplement (doi:10.1039/c9fo02016k), 2020-01-01
Supplement: c9fo02016k3.pdf [file c9fo02016k3.pdf]

1 Supplementary Table S3. The common up-regulated proteins shared in two batches (TR and AO) versus DW identified by label-free analysis.

| Accession  | Description                                          | Organism                                  | Coverage | Peptides | PSMs | Unique Peptides | AAs  | MW [kDa] | calc. pI | emPAI   | Score Sequest HT |
|------------|------------------------------------------------------|-------------------------------------------|----------|----------|------|-----------------|------|----------|----------|---------|------------------|
| G0ZJ10     | 2-phospho-D-glycerate hydrolase (Fragment)           | <i>Cherax quadricarinatus</i>             | 31.08    | 4        | 66   | 2               | 222  | 24.3     | 5.07     | 1.955   | 76.91            |
| O96658     | Actin 2                                              | <i>Penaeus monodon</i>                    | 72.14    | 24       | 4967 | 1               | 377  | 41.8     | 5.24     | 1444.44 | 7004.08          |
| H6CSY4     | Actin 6 (Fragment)                                   | <i>Pandalus platyceros</i>                | 50.43    | 10       | 1379 | 3               | 228  | 25.2     | 5.21     | 12.594  | 1103.45          |
| Q962V5     | Alpha actin                                          | <i>Homarus americanus</i>                 | 56.76    | 19       | 2670 | 1               | 377  | 41.9     | 5.31     | 35.308  | 2791.65          |
| A0A2P1JJ58 | Alpha-actinin, sarcomeric-like isoform X1 (Fragment) | <i>Procambarus clarkii</i>                | 60.33    | 53       | 774  | 12              | 890  | 102.7    | 5.35     | 27.23   | 1694.14          |
| A0A0N7ZCJ7 | ATP synthase subunit alpha                           | <i>Scylla olivacea</i>                    | 33.45    | 14       | 71   | 2               | 550  | 59.3     | 9.1      | 1.33    | 169.1            |
| A0T2V0     | Beta-actin                                           | <i>Penaeus monodon</i>                    | 72.14    | 24       | 4730 | 3               | 377  | 42       | 5.14     | 574.44  | 5953.13          |
| O17314     | Calcium-transporting ATPase                          | <i>Procambarus clarkii</i>                | 24.21    | 23       | 388  | 2               | 1020 | 112.4    | 5.45     | 3.748   | 782.54           |
| K9S0T9     | Calmodulin                                           | <i>Portunus trituberculatus</i>           | 46.97    | 6        | 23   | 6               | 149  | 16.8     | 4.22     | 4.623   | 52.25            |
| O02449     | Elongation factor 1-alpha (Fragment)                 | <i>Libinia emarginata</i>                 | 42.85    | 10       | 63   | 1               | 364  | 40.1     | 8.18     | 1.471   | 88.84            |
| E3T0W9     | Elongation factor 1-alpha                            | <i>Litopenaeus vannamei</i>               | 42.95    | 13       | 85   | 1               | 461  | 50.8     | 8.95     | 1.818   | 170.72           |
| R9YWA0     | Enolase (Fragment)                                   | <i>Kiwa sp. n. Southwest Indian Ridge</i> | 36.28    | 3        | 32   | 1               | 113  | 12.4     | 5.1      | 1.848   | 87.32            |
| A0A068FCL9 | Fructose-bisphosphate aldolase                       | <i>Fenneropenaeus chinensis</i>           | 64.93    | 23       | 609  | 18              | 365  | 39.8     | 7.06     | 45.416  | 1039.47          |
| A0A0P4WGN0 | Glycerol-3-phosphate dehydrogenase [NAD(+)]          | <i>Scylla olivacea</i>                    | 24.28    | 9        | 37   | 9               | 420  | 46.2     | 7.31     | 1.336   | 111.66           |
| G1AP69     | Hemocyanin                                           | <i>Penaeus monodon</i>                    | 33.67    | 20       | 191  | 2               | 683  | 77.9     | 5.57     | 7.072   | 319.82           |

|                |                                                             |                             |       |     |      |    |      |       |       |         |          |
|----------------|-------------------------------------------------------------|-----------------------------|-------|-----|------|----|------|-------|-------|---------|----------|
| H9LFA4         | Mitochondrial ATP synthase delta subunit                    | <i>Litopenaeus vannamei</i> | 9.49  | 1   | 13   | 1  | 158  | 16.5  | 4.74  | 0.52    | 18.45    |
| Q8T6G0         | Myosin heavy chain (Fragment)                               | <i>Homarus gammarus</i>     | 51.21 | 1   | 4    | 1  | 41   | 4.6   | 5.11  | 3.642   | 3.61     |
| K4Q111         | Myosin heavy chain type 1                                   | <i>Litopenaeus vannamei</i> | 70.46 | 191 | 9279 | 53 | 1913 | 219.6 | 6.02  | 265.708 | 17224.86 |
| K4Q2Y1         | Myosin heavy chain type 2                                   | <i>Penaeus monodon</i>      | 60.60 | 148 | 6644 | 8  | 1909 | 219   | 6.16  | 95.041  | 11270.86 |
| D7F2L7         | Paramyosin (Fragment)                                       | <i>Palaemon varians</i>     | 33.82 | 2   | 26   | 2  | 68   | 8     | 8.15  | 4.179   | 55.51    |
| A0A0P4VU<br>A5 | Phosphorylase b kinase regulatory subunit                   | <i>Scylla olivacea</i>      | 5.28  | 7   | 12   | 7  | 1212 | 136.1 | 6.65  | 0.216   | 28.42    |
| Q86GD6         | Projectin                                                   | <i>Procambarus clarkii</i>  | 10.55 | 80  | 389  | 77 | 8625 | 962   | 6.43  | 0.406   | 766.82   |
| C4PL18         | Ribosomal protein L3                                        | <i>Penaeus monodon</i>      | 20.93 | 8   | 14   | 6  | 406  | 46.4  | 10.3  | 1.021   | 31.35    |
| Q2I3E8         | Ribosomal protein L8                                        | <i>Litopenaeus vannamei</i> | 24.90 | 5   | 18   | 5  | 257  | 28.2  | 11.05 | 0.957   | 30.16    |
| D7F2L3         | Sarcoplasmic calcium-binding protein 1 (Fragment)           | <i>Palaemon varians</i>     | 32.35 | 3   | 379  | 1  | 68   | 7.7   | 4.84  | 2.162   | 129.08   |
| C7A639         | Sarcoplasmic calcium-binding protein                        | <i>Litopenaeus vannamei</i> | 87.04 | 25  | 2938 | 5  | 193  | 22.1  | 4.89  | 706.946 | 3631.2   |
| A0A0B5JEF<br>0 | Sarcoplasmic calcium-binding protein variant a              | <i>Eriocheir sinensis</i>   | 25.38 | 5   | 532  | 1  | 193  | 21.9  | 4.81  | 1.154   | 473.55   |
| P02636         | Sarcoplasmic calcium-binding protein, alpha-B and -A chains | <i>Penaeus sp.</i>          | 69.79 | 20  | 2169 | 4  | 192  | 22    | 4.81  | 49.119  | 2120.46  |
| B6EAU4         | Skeletal muscle actin 4                                     | <i>Homarus americanus</i>   | 55.70 | 21  | 3194 | 5  | 377  | 41.9  | 5.31  | 189.546 | 3690     |
| K4EG00         | Skeletal muscle alpha actin (Fragment)                      | <i>Pandalus platyceros</i>  | 33.94 | 7   | 1508 | 1  | 218  | 24.2  | 5.29  | 7.483   | 1587.83  |
| Q6XGZ8         | Slow muscle myosin S1 heavy chain (Fragment)                | <i>Homarus americanus</i>   | 36.88 | 23  | 906  | 3  | 507  | 58.5  | 5.27  | 5.19    | 846.45   |
| A0A139Z42      | Sodium/potassium-transporting                               | <i>Litopenaeus vannamei</i> | 31.98 | 26  | 51   | 17 | 1038 | 115.3 | 5.48  | 1.31    | 130.01   |

---

|                |                       |                             |       |    |      |    |     |      |      |         |         |  |
|----------------|-----------------------|-----------------------------|-------|----|------|----|-----|------|------|---------|---------|--|
| 4              | ATPase subunit alpha  |                             |       |    |      |    |     |      |      |         |         |  |
| A0A0P0C4<br>Q7 | Tetraspanin           | <i>Litopenaeus vannamei</i> | 29.28 | 3  | 14   | 3  | 239 | 25.7 | 4.65 | 2.162   | 43.35   |  |
| A1KYZ2         | Tropomyosin           | <i>Penaeus monodon</i>      | 77.46 | 37 | 1486 | 9  | 284 | 32.8 | 4.75 | 130.113 | 2038.73 |  |
| K7WFT8         | Troponin I            | <i>Litopenaeus vannamei</i> | 48.61 | 15 | 294  | 3  | 216 | 24.8 | 9.51 | 19.153  | 601.98  |  |
| A0A2P0ND<br>U9 | Troponin T            | <i>Palaemon carinicauda</i> | 17.92 | 11 | 245  | 11 | 385 | 45.7 | 5.06 | 3.541   | 325.73  |  |
| Q94570         | Tubulin alpha-2 chain | <i>Homarus americanus</i>   | 13.08 | 4  | 35   | 2  | 451 | 50.2 | 5.19 | 0.585   | 81.25   |  |

---
